# Supplementary material for: Usnic acid based thiazole-hydrazones as multi-targeting inhibitors of a wide spectrum of SARS-CoV-2 viruses
Source: Royal Society of Chemistry journal article supplement (doi:10.1039/d3nj03598k), 2023-01-01
Supplement: d3nj03598k1.pdf [file d3nj03598k1.pdf]

## **Usnic acid based thiazole-hydrazones as multi-targeting inhibitors of a wide spectrum of SARS-CoV-2 viruses**

Olga I. Yarovaya,<sup>\*a</sup> Aleksandr S. Filimonov,<sup>a</sup> Dmitriy Baev,<sup>a</sup> Sophia S. Borisevich,<sup>b</sup> Varvara Chirkova,<sup>c</sup> Anna V. Zaykovskaya,<sup>d</sup> Ekaterina D. Mordvinova,<sup>a,d</sup> Svetlana V. Belenkaya,<sup>d</sup> Dmitriy N. Shcherbakov,<sup>d</sup> Olga A. Luzina,<sup>a</sup> Oleg V. Pyankov,<sup>d</sup> and Nariman F. Salakhutdinov<sup>a</sup>

a. Department of Medicinal Chemistry, N.N. Vorozhtsov Novosibirsk Institute of Organic Chemistry SB RAS, Lavrentyev av., 630090, Russia, Novosibirsk, Russian Federation E-mail: ooo@nioch.nsc.ru

b. Laboratory of Chemical Physics, Ufa Institute of Chemistry Ufa Federal Research Center, 71 Pr. Oktyabrya, 450078, Ufa, Russia

c. Altay State University 656049, Barnaul, Leninski pr., 61 Russian Federation

d. State Research Center of Virology and Biotechnology VECTOR, Rospotrebnadzor, 630559, Russia, Koltsovo, Novosibirsk Region, Russian Federation.

### **Supplementary Material**

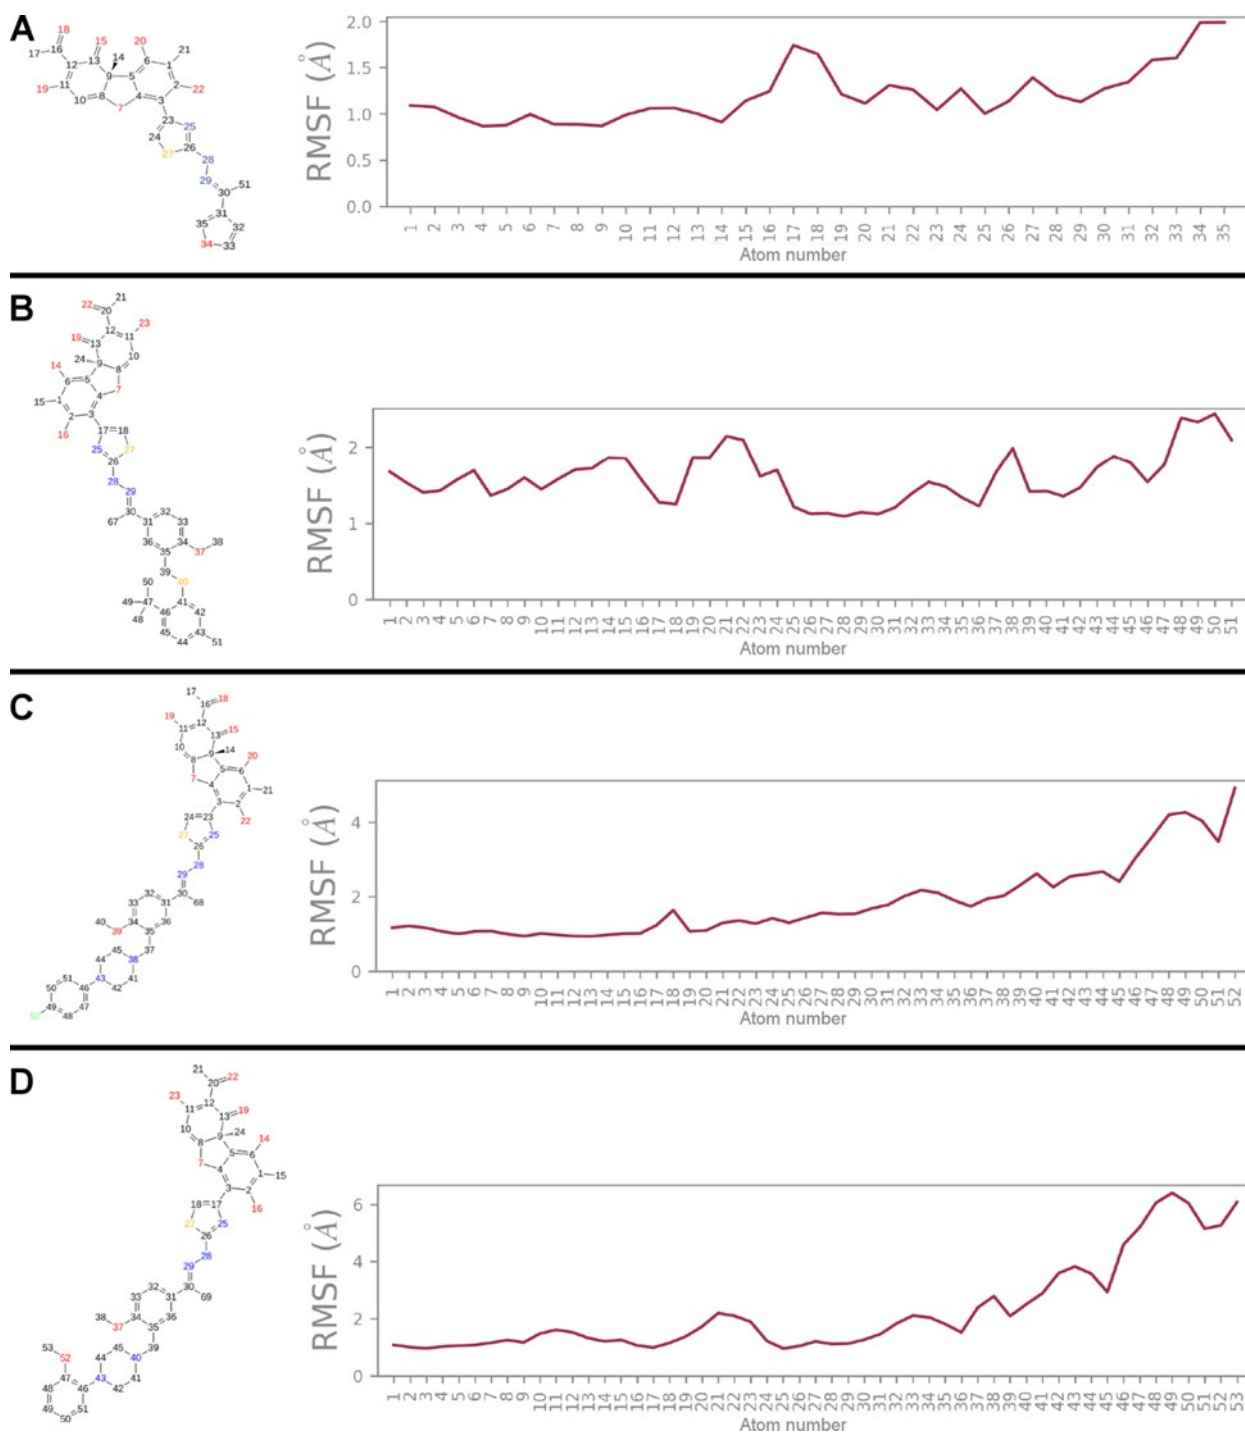

**Figure S1** RMSF plots of novel usnic acid derivatives. The position of each atom is indicated by a number for each molecular structure. A - (+)-7a, B - (+)-10g, C - (+)-10i, D - (-)-10j.

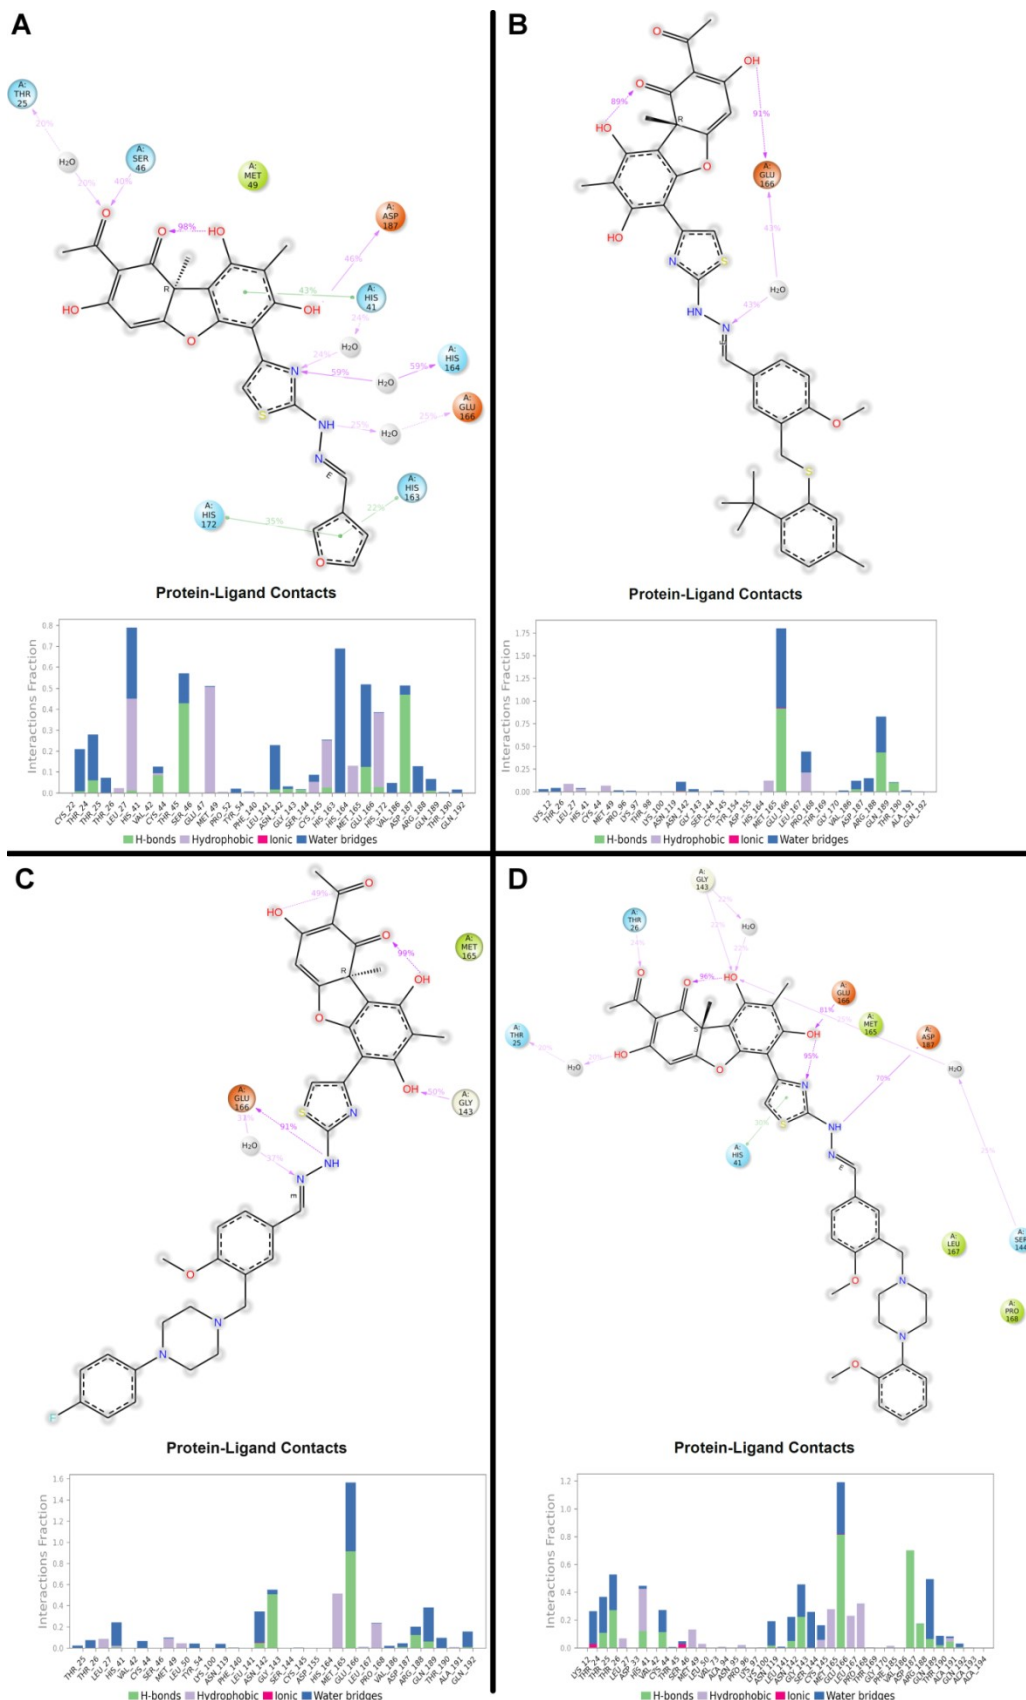

**Figure S2** Diagrams of possible interactions of new usnic acid derivatives in the active site of the main protease. The percentage of molecular dynamics simulation time during which the observed interactions existed is given. Purple lines with arrows mark hydrogen bonds, green lines indicate stacking interactions, hydrophobic contacts are possible with individual amino acids without lines. For each molecule, a chart of all possible non-covalent interactions with amino acids of the active site of the main protease is given. A - (+)-7a, B - (+)-10g, C - (+)-10i, D - (-)-10j.

**Table S1** A.a. alignment NTD of S-protein and analysis of biliverdin binding site

| Strain            | Mutations                       | Distance from the binding site, Å | Deletion | Distance from the binding site, Å |
|-------------------|---------------------------------|-----------------------------------|----------|-----------------------------------|
| Delta (B.1.617.2) | T95I<br>G142D<br>Y145H<br>F158G | ~ 11<br>~ 13<br>~ 20<br>~ 16      | 156-157  | ~ 10-12                           |
| Omicron BA.1      | T95I                            | ~ 11                              | 143-145  | ~ 15                              |
| Omicron BA 5.2    | G142D<br>V213G                  | ~ 13<br>~ 18                      |          |                                   |
| Omicron XBB.1.5   | H146Q<br>Q183E<br>V213E         | ~ 25<br>~ 15<br>~ 18              | 144      | ~ 22                              |
| Omicron BQ1.1     | G142D<br>V213G                  | ~ 13<br>~ 18                      |          |                                   |

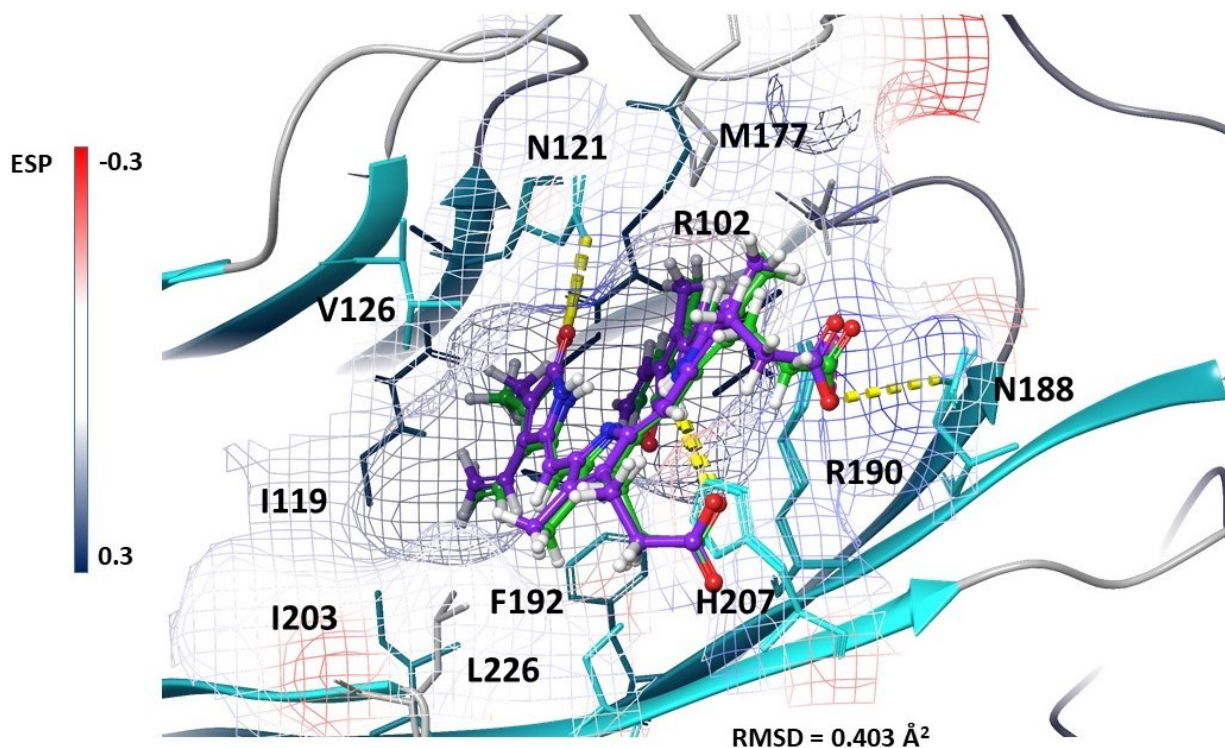**Figure S3** Result of molecular re-docking procedure: green molecule is correspond to geometrical parameters from X-ray complex (PDB ID: 7B62), violet – obtained from re-docking. H-bonds are shown yellow dotted line.**Table S2** S glycoprotein molecular docking and metadynamics results

| ID      | pIC <sub>50</sub> | Docking score, kcal/mol | Emodel, kcal/mol | IFD score, kcal/mol | Interactions with a.a. |                    | Pose Score (MD) | $\Delta G_{\text{bind}}$ , kcal/mol |
|---------|-------------------|-------------------------|------------------|---------------------|------------------------|--------------------|-----------------|-------------------------------------|
|         |                   |                         |                  |                     | H-bond                 | Others             |                 |                                     |
| (+)-7a  | 6.19              | -9.083                  | -96.26           | -657.16             | N121<br>L101           | none               | 1.18            | -91.2                               |
| (+)-10g | 5.03              | -10.278                 | -109.66          | -657.93             | N121<br>L101<br>Q173   | F192 $\pi$ - $\pi$ | 1.21            | -70.5                               |
| (+)-10i | 5.97              | -10.579                 | -100.47          | -654.42             | N121<br>I101           | H207 $\pi$ - $\pi$ | 2.37            | -76.3                               |

|         |      |        |        |         |                                     |                    |      |       |
|---------|------|--------|--------|---------|-------------------------------------|--------------------|------|-------|
| (+)-10j | 5.69 | -7.185 | -90.02 | -653.17 | Y170<br>I101<br>N99<br>R190<br>H207 | W104 $\pi$ - $\pi$ | 1.85 | -84.1 |
|---------|------|--------|--------|---------|-------------------------------------|--------------------|------|-------|

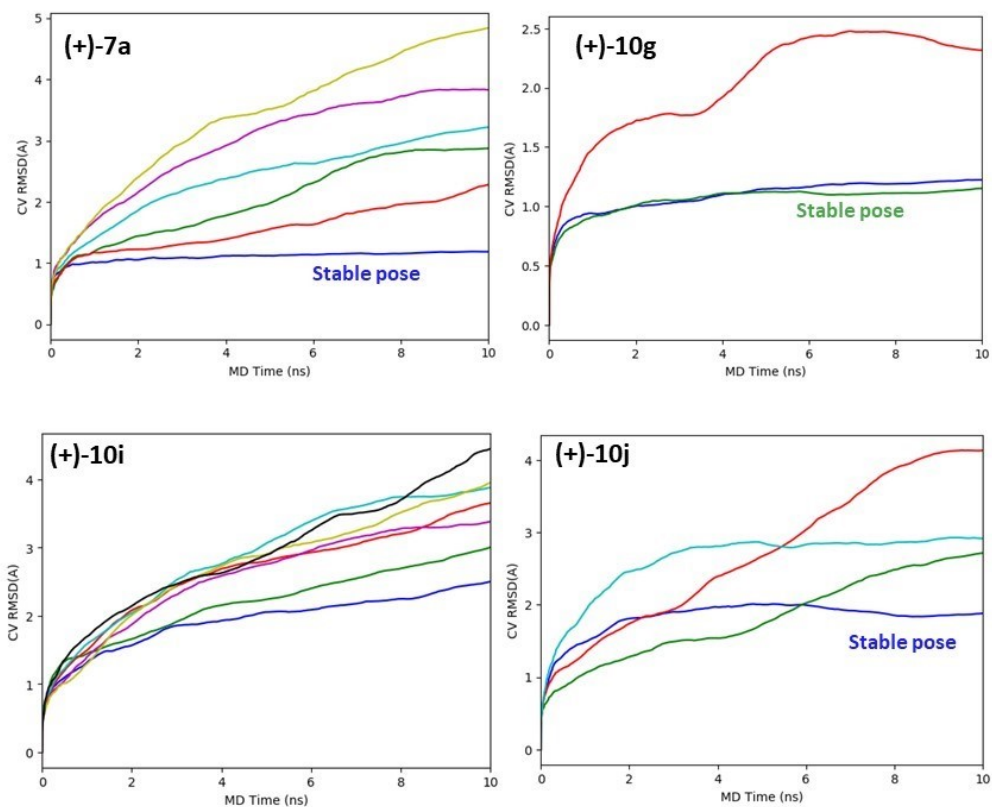

Figure S4 RMSD fluctuation of docking poses of studied compounds

#### The NMR spectrum of compound 1

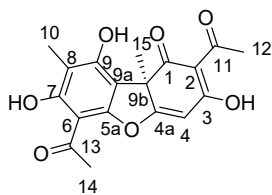

NMR  $^1\text{H}$  ( $\text{CDCl}_3$ ,  $\delta$ ): 1.74 (3H, s, H-15), 2.09 (3H, s, H-10), 2.64 and 2.66 (6H, s, H-12 and H-14), 5.96 (1H, s, H-4), 11.02 (OH-9), 13.30 (OH-7), 18.84 (OH-3).

The NMR spectra of compounds 7-10

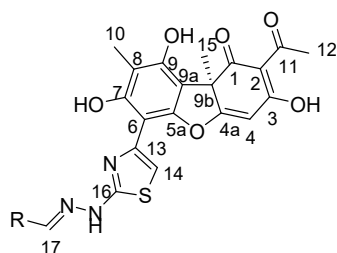

NMR  $^1\text{H}$  ( $\text{CDCl}_3$ ,  $\delta$ ): 1.67 (3H, s, H-15), 2.13 (3H, s, H-10), 2.61 (3H, s, H-12), 5.88 (1H, s, H-4).

NMR  $^1\text{H}$  ( $\text{DMSO-}d_6$ ,  $\delta$ ): 1.70 (3H, s, H-15), 2.03 (3H, s, H-10), 2.60 (3H, s, H-12), 6.20 (1H, s, H-4).

**Table S3.** NMR $^1\text{H}$  spectra of 16k–16o ( $\text{CDCl}_3$  for 7a,b, 8b, 9a,b and  $\text{DMSO-}d_6$  for 8a,c;  $\delta$ ).

| No            | 7a                     | 7b                                   | 8a       | 8b      | 8c      | 9a                     | 9b       |
|---------------|------------------------|--------------------------------------|----------|---------|---------|------------------------|----------|
|               |                        |                                      |          |         |         |                        |          |
| H-14          | s 7.15                 | s 7.12                               | s 7.24   | s 7.09  | s 7.37  | s 7.24                 | s 7.22   |
| H-17          | s 7.60                 | s 7.68                               | s 7.94   | s 7.68  | s 8.09  | s 8.30                 | s 8.33   |
| H-19          | d 6.65<br>(J = 2.5 Hz) | d 6.69<br>(J = 3.3 Hz,<br>AB-system) | s 6.46   | m 6.39  | s 8.00  | m 8.21                 |          |
| H-20          | m 6.45                 | d 6.66<br>(J = 3.3 Hz,<br>AB-system) | s 6.14   | m 6.11  | s 9.17  |                        |          |
| H-21          | d 7.49 (J =<br>2.2 Hz) |                                      | s 6.92   | s 6.72  |         | s 7.45                 | m 7.34   |
| H-22          |                        | s 7.62                               |          | s 3.91  |         | m 7.21                 | m 7.13   |
|               |                        |                                      |          |         |         | m 7.21                 | m 7.13   |
|               |                        |                                      |          |         |         | d 7.83 (J =<br>2.7 Hz) | m 8.10   |
|               |                        | d 7.52<br>(J = 7.5 Hz)               |          |         |         |                        |          |
|               |                        | m 7.21–7.30                          |          |         |         |                        | s 2.51   |
|               |                        | m 7.21–7.30                          |          |         |         |                        |          |
| NH            | s 8.88                 | ---                                  | ---      | bs 8.68 | ---     | s 12.08                | s 12.00  |
| NH<br>(HetAr) |                        |                                      | s 11.30  |         | s 12.60 | s 11.59                | s 11.51  |
| OH-3          | s 18.77                | s 18.76                              | bs 18.77 | s 18.79 | ---     | bs 18.82               | bs 18.82 |
| OH-7          | bs 12.40               | ---                                  | s 12.05  | ---     | s 12.71 | s 13.03                | bs 13.05 |
| OH-9          | s 10.26                | s 10.26                              | s 10.28  | s 10.28 | s 10.31 | s 10.30                | s 10.31  |

**Table S4.** NMR<sup>1</sup>H spectra of 17a–17f (CDCl<sub>3</sub>, δ).

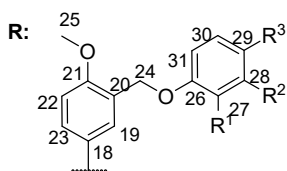

**10a** R<sup>1</sup>=H R<sup>2</sup>=H R<sup>3</sup>=F  
**10b** R<sup>1</sup>=H R<sup>2</sup>=F R<sup>3</sup>=H  
**10c** R<sup>1</sup>=F R<sup>2</sup>=H R<sup>3</sup>=H  
**10d** R<sup>1</sup>=H R<sup>2</sup>=Cl R<sup>3</sup>=F  
**10e** R<sup>1</sup>=F R<sup>2</sup>=H R<sup>3</sup>=F  
**10f** R<sup>1</sup>=H R<sup>2</sup>=Me R<sup>3</sup>=Cl

| No   | 10a         | 10b                    | 10c                    | 10d                    | 10e                    | 10f                    |
|------|-------------|------------------------|------------------------|------------------------|------------------------|------------------------|
| H-14 | s 7.09      | s 7.02                 | m 7.05                 | s 7.06                 | s 7.09                 | s 7.07                 |
| H-17 | m 7.45–7.65 | s 7.81                 | s 7.68                 | s 7.64                 | s 7.60                 | s 7.69                 |
| H-19 | m 7.45–7.65 | s 7.71                 | s 7.62                 | s 7.61                 | s 7.56                 | s 7.64                 |
| H-22 | m 6.82–6.97 | d 6.77<br>(J = 8.6 Hz) | d 6.78<br>(J = 7.0 Hz) | m 6.82                 | d 6.51<br>(J = 7.9 Hz) | m 6.76                 |
| H-23 | m 7.45–7.65 | d 7.44<br>(J = 8.6 Hz) | d 7.44<br>(J = 7.0 Hz) | d 7.48<br>(J = 7.3 Hz) | d 7.48<br>(J = 8.3 Hz) | d 7.51<br>(J = 8.3 Hz) |
| H-24 | s 5.00      | s 5.07                 | s 5.09                 | s 4.97                 | s 5.00                 | s 4.99                 |
| H-25 | s 3.83      | s 3.79                 | s 3.79                 | s 3.82                 | s 3.84                 | s 3.84                 |
| H-27 | m 6.82–6.97 | m 6.90–7.10            | s 6.91                 | m 7.01                 |                        | d 6.88<br>(J = 2.4 Hz) |
| H-28 | m 6.82–6.97 | m 6.90–7.10            | m 7.05                 |                        | d 6.82<br>(J = 7.9 Hz) | s 2.34 (Me)            |
| H-29 |             | m 6.90–7.10            | m 7.05                 |                        |                        |                        |
| H-30 | m 6.82–6.97 |                        | m 7.05                 | m 7.01                 | t 6.41<br>(J = 8.4 Hz) | d 7.21<br>(J = 8.6 Hz) |
| H-31 | m 6.82–6.97 | m 6.90–7.10            |                        | m 6.82                 |                        | d 6.83<br>(J = 8.5 Hz) |
| NH   | bs 8.92     | ---                    | bs 9.45                | bs 9.45                | bs 8.93                | bs 9.56                |
| OH-3 | s 18.78     | s 18.77                | s 18.76                | s 18.77                | s 18.78                | s 18.79                |
| OH-7 | ---         | ---                    | ---                    | ---                    | bs 12.21               | ---                    |
| OH-9 | s 10.24     | s 10.29                | s 10.23                | s 10.24                | s 10.23                | s 10.27                |

**Table S5.** NMR<sup>1</sup>H spectra of 17g–17k (CDCl<sub>3</sub> for g–j and DMSO-*d*6 for k, δ).

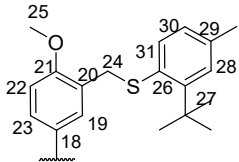

**10g**



**10h**



**10i** R<sup>1</sup>=H R<sup>2</sup>=F  
**10j** R<sup>1</sup>=OMe R<sup>2</sup>=H



**10k**

| No   | 10g                    | 10k    | 10i                    | 10j                    | 10k                    |
|------|------------------------|--------|------------------------|------------------------|------------------------|
| H-14 | s 7.08                 | s 7.07 | s 7.00                 | s 6.98                 | s 7.23                 |
| H-17 | s 7.49                 | s 7.69 | bs 7.98                | s 8.13                 | s 7.26                 |
| H-19 | s 7.32                 | s 7.60 | bs 7.98                | s 8.05                 | s 7.67                 |
| H-22 | d 6.76<br>(J = 8.5 Hz) | m 6.80 | d 6.56<br>(J = 8.0 Hz) | d 6.46<br>(J = 8.1 Hz) | d 7.08<br>(J = 8.4 Hz) |
| H-23 | m 7.40                 | m 7.47 | m 7.34                 | m 6.84–7.03            | d 7.50<br>(J = 8.4 Hz) |
| H-24 | s 4.04                 | s 4.51 | s 4.11                 | s 4.19                 | s 5.27                 |
| H-25 | s 3.77                 |        | s 3.61                 | bs 3.51                | s 3.85                 |
| H-26 |                        |        | s 3.29                 | bs 3.51                |                        |
| H-27 | s 1.22 (t-Bu)          |        | s 3.48                 | m 3.85                 |                        |
| H-28 | m 7.23                 | s 2.73 |                        |                        |                        |
| H-29 | m 7.08                 |        | m 6.83–6.94            | m 6.84–7.03            | s 2.40                 |
| H-30 | s 2.33 (Me)            |        | m 6.83–6.94            | m 3.85 (OMe)           | s 2.59                 |
| H-31 | m 7.32                 |        |                        | m 6.84–7.03            |                        |
| H-32 |                        |        | m 6.83–6.94            | m 6.84–7.03            |                        |
| H-33 |                        |        | m 6.83–6.94            | m 6.84–7.03            |                        |
| NH   | bs 9.09                |        | bs 11.22               | bs 11.22               | bs 12.28               |
| OH-3 | s 18.79                |        | bs 18.7                | bs 18.76               | bs 18.80               |
| OH-7 | ---                    |        | bs 12.64               | bs 12.63               | bs 12.77               |
| OH-9 | s 10.26                |        | s 10.24                | s 10.23                | s 10.30                |

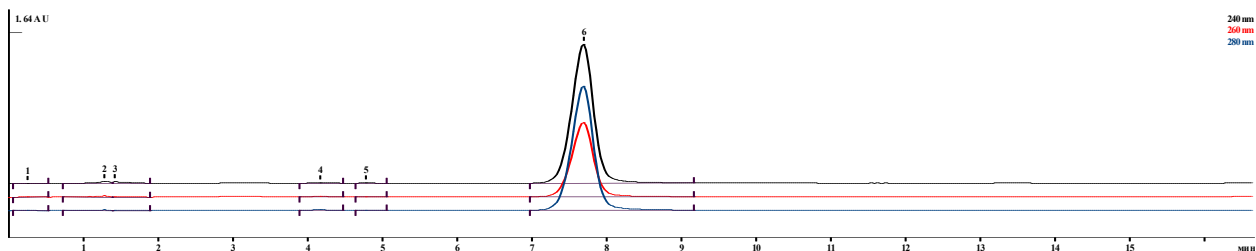

**Figure S5** HPLC for compound (99.05% of usnic acid)



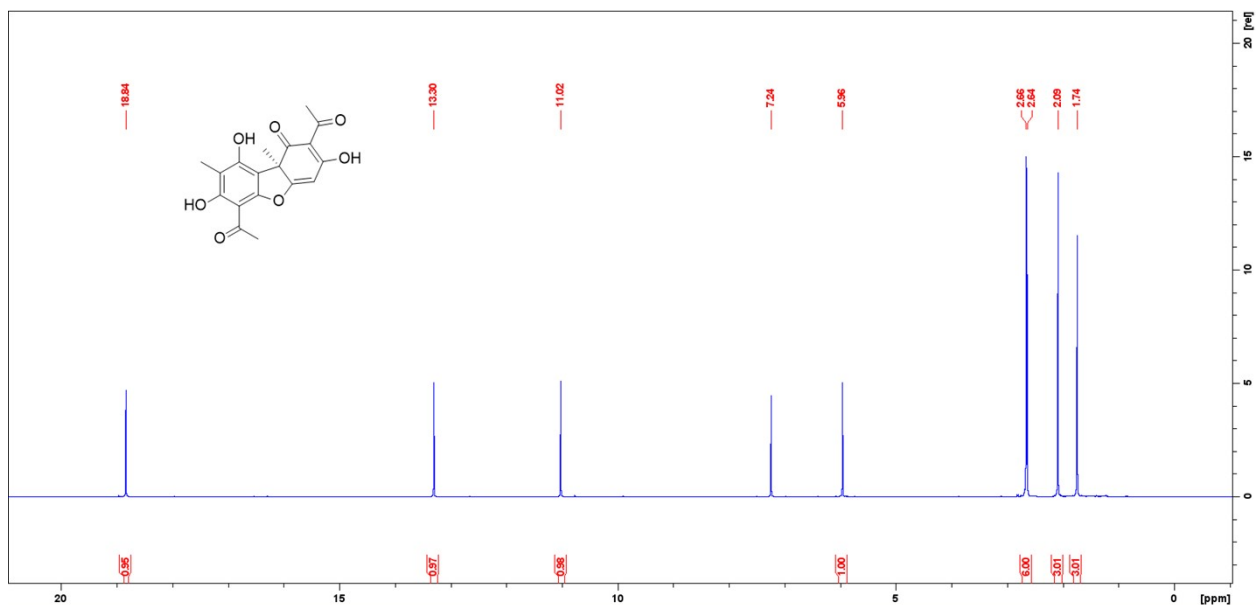

Figure S6: NMR  $^1\text{H}$  spectrum of **1**

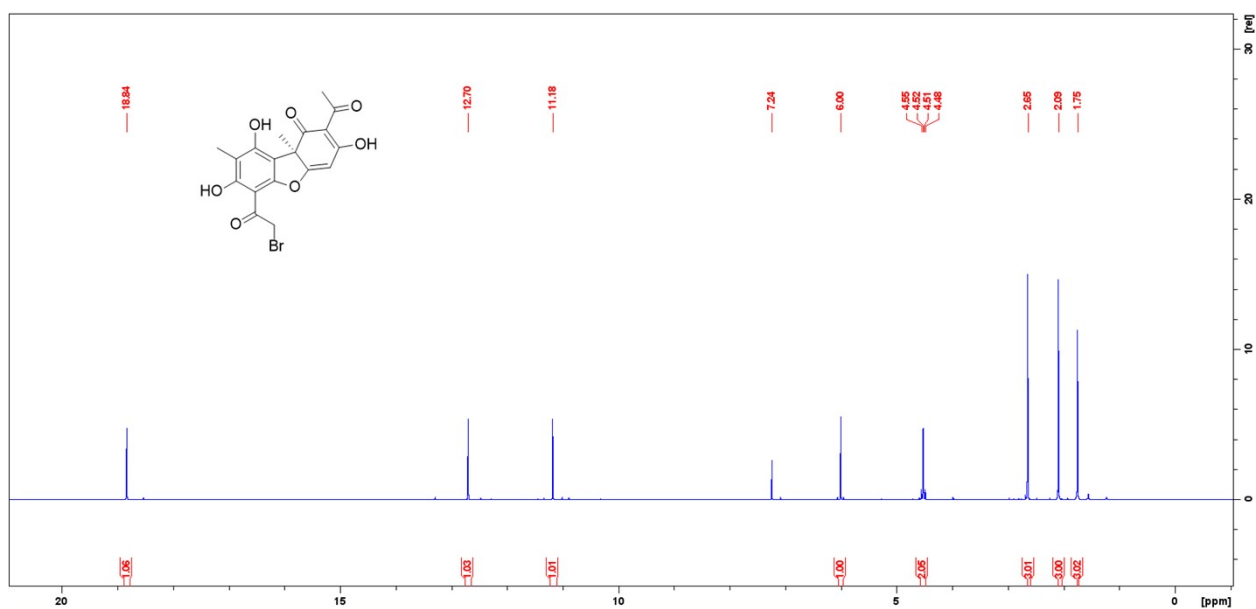

Figure S7: NMR  $^1\text{H}$  spectrum of **5**

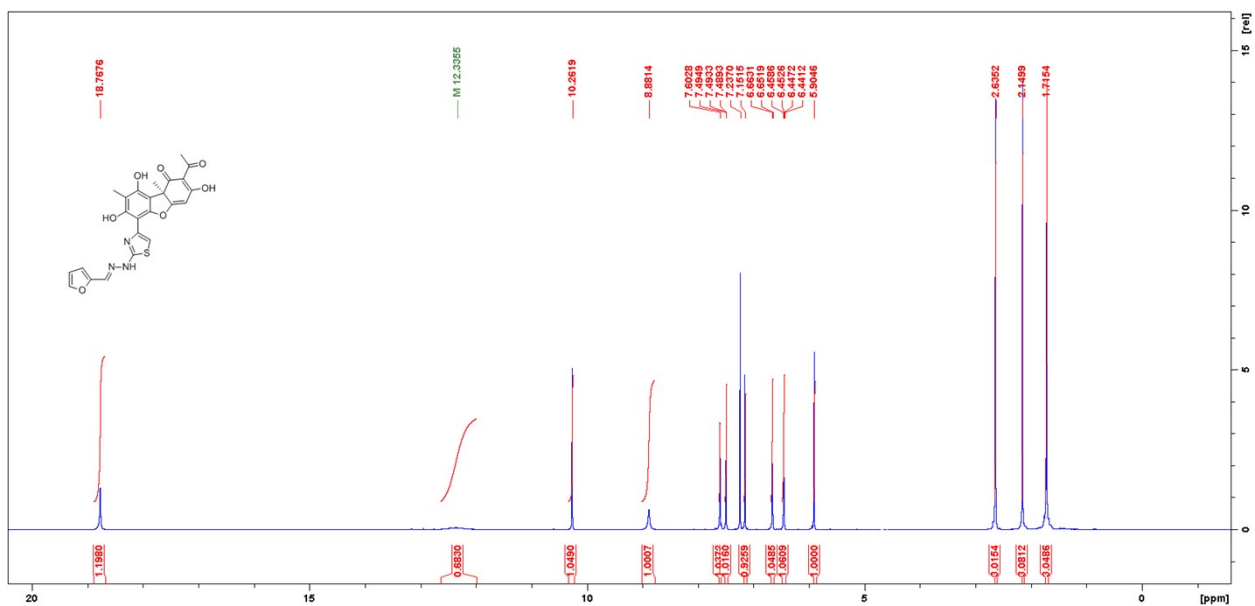

Figure S8: NMR  $^1\text{H}$  spectrum of 7a

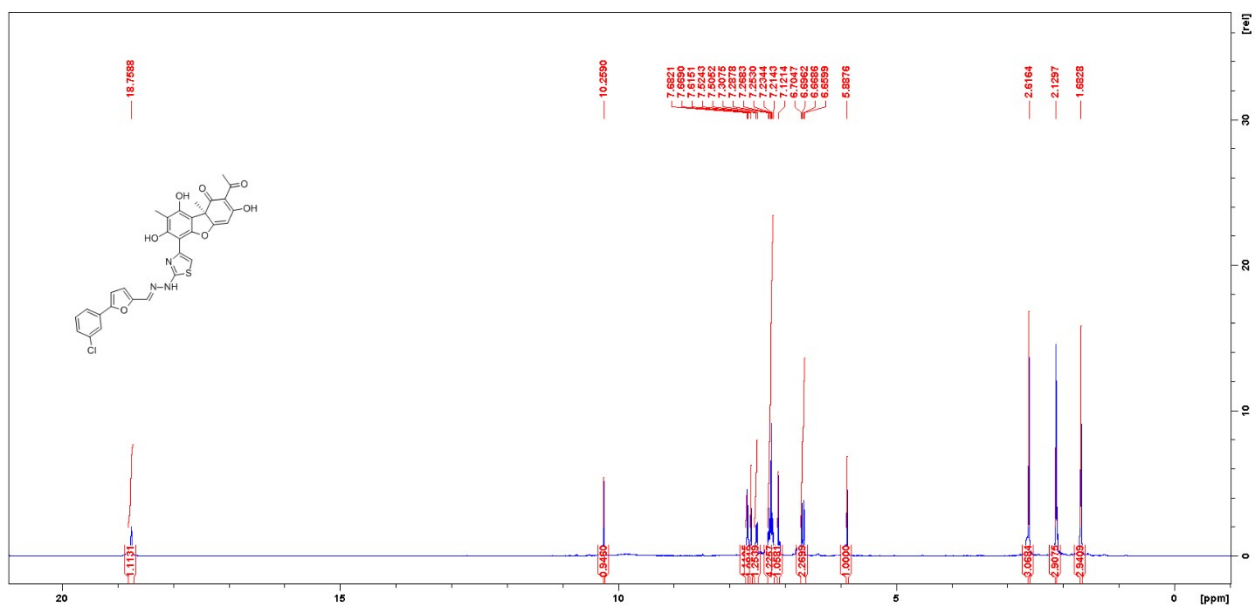

Figure S9: NMR  $^1\text{H}$  spectrum of 7b

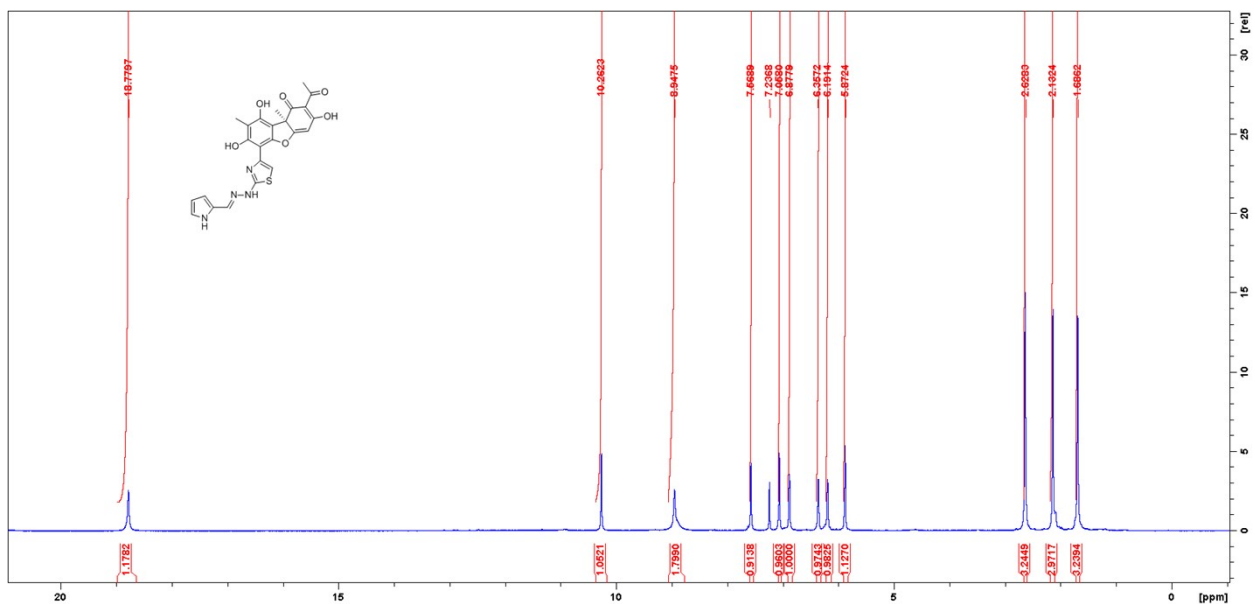

Figure S10: NMR <sup>1</sup>H spectrum of 8a

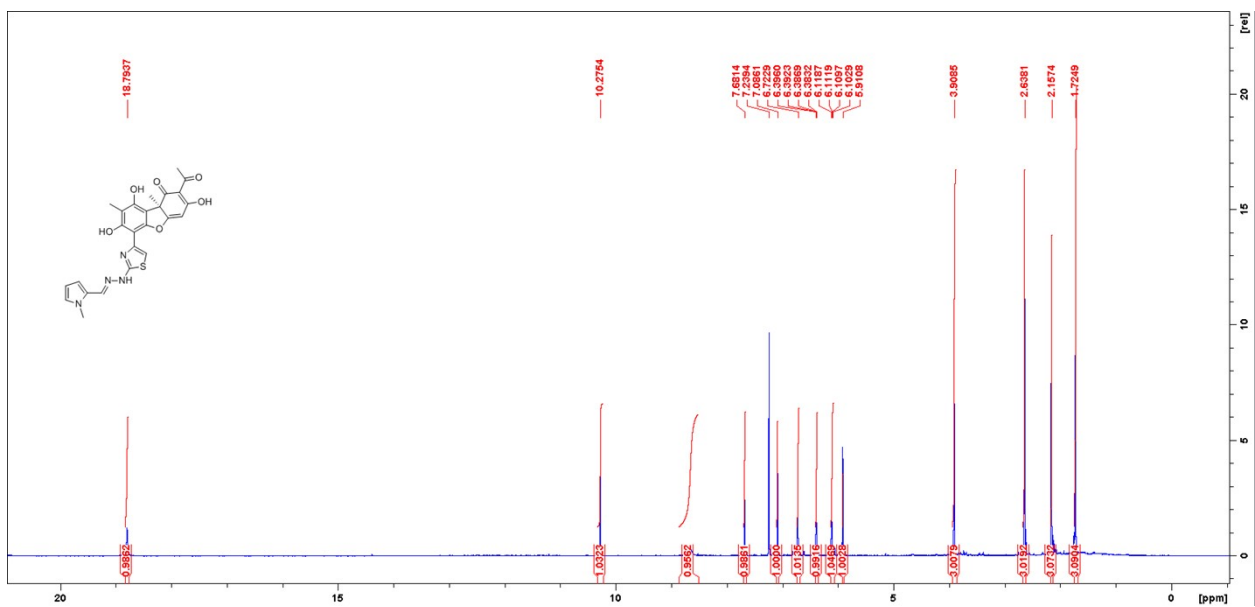

Figure S11: NMR <sup>1</sup>H spectrum of 18b

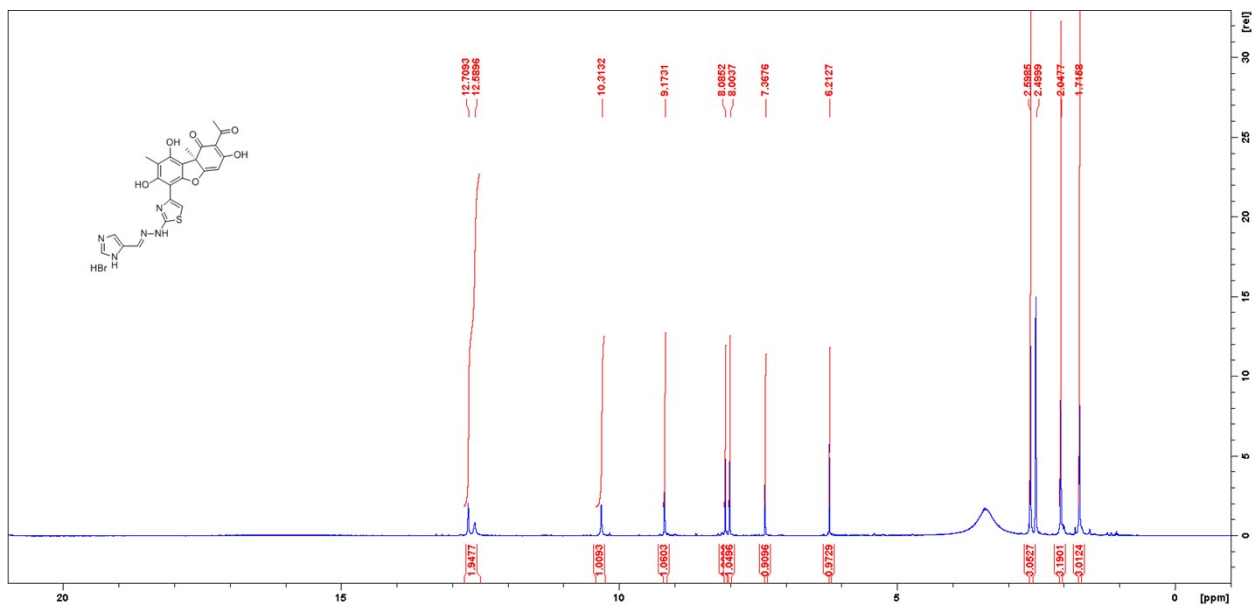

Figure S12: NMR  $^1\text{H}$  spectrum of 8c

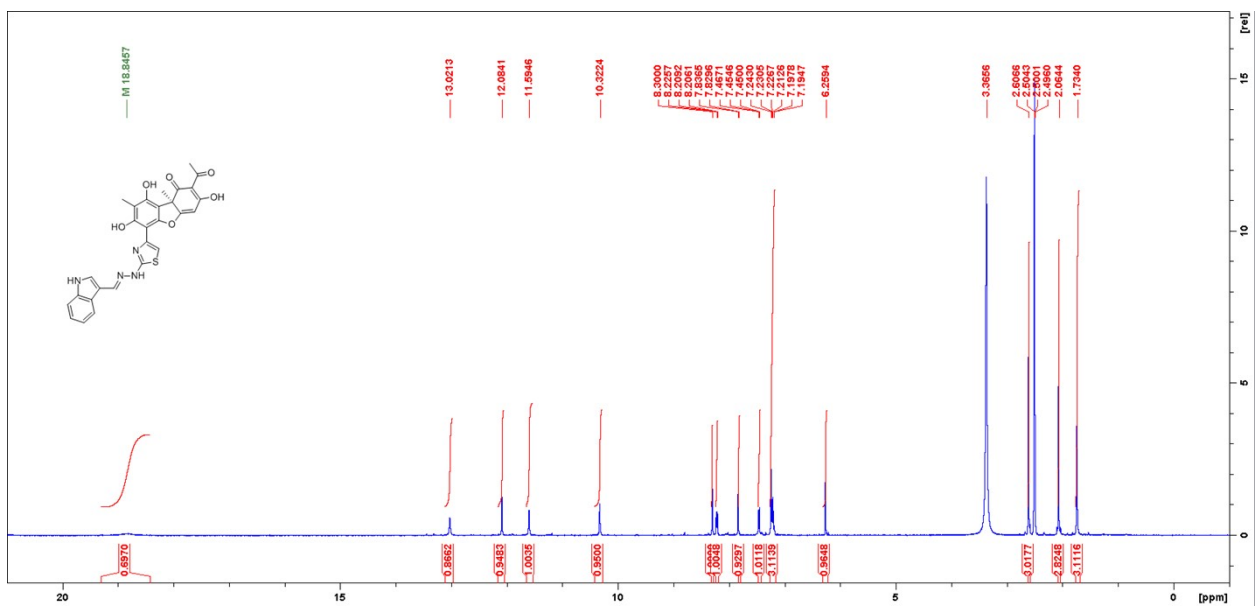

Figure S13: NMR  $^1\text{H}$  spectrum of 9a

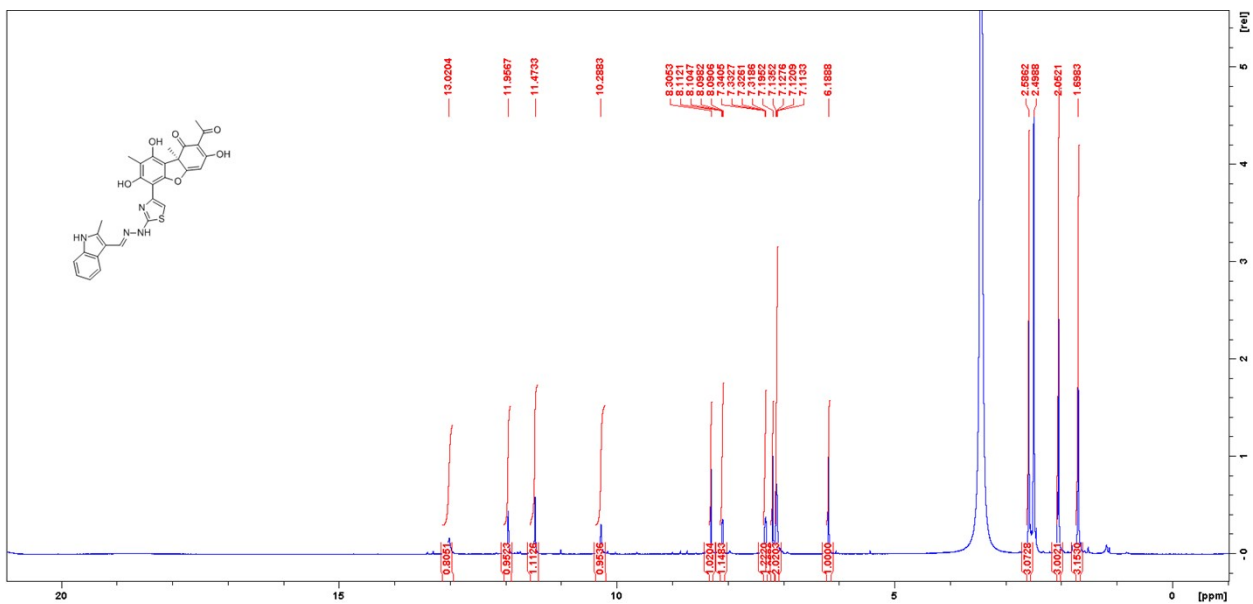

Figure S14: NMR  $^1\text{H}$  spectrum of 9b

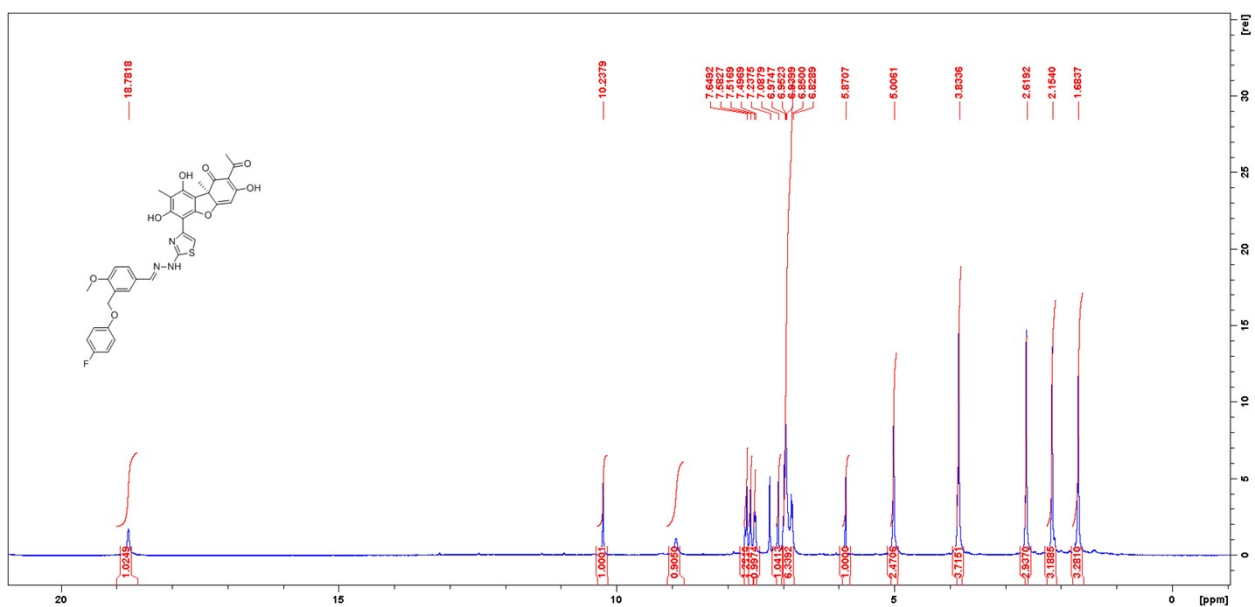

Figure S15: NMR  $^1\text{H}$  spectrum of 10a

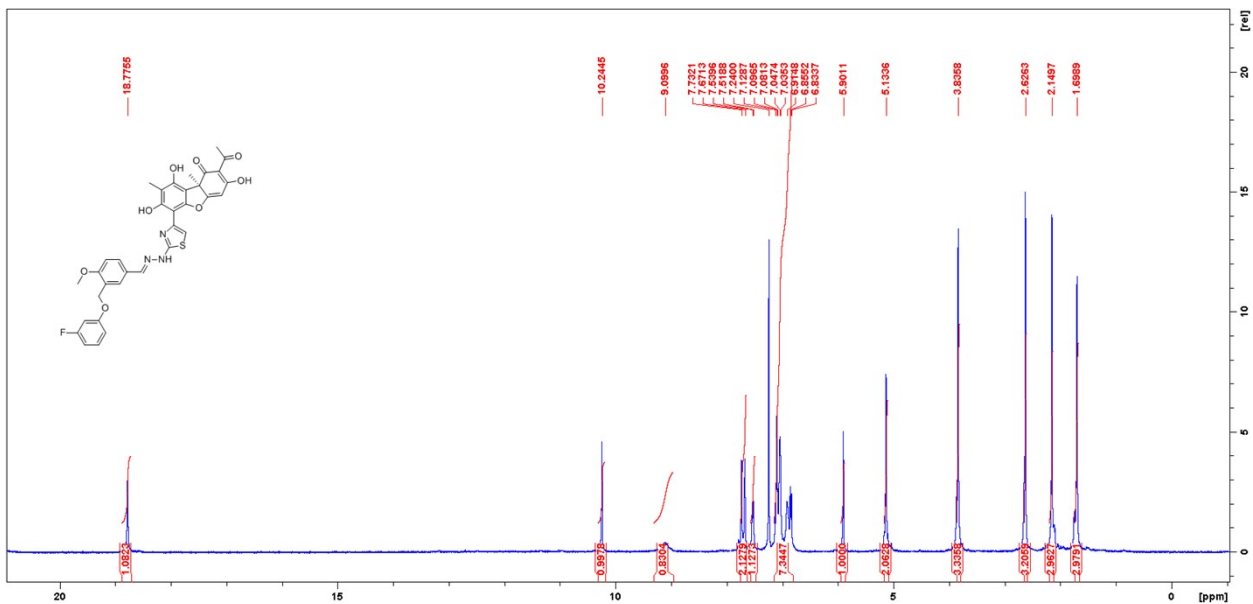

Figure S16: NMR <sup>1</sup>H spectrum of 10b

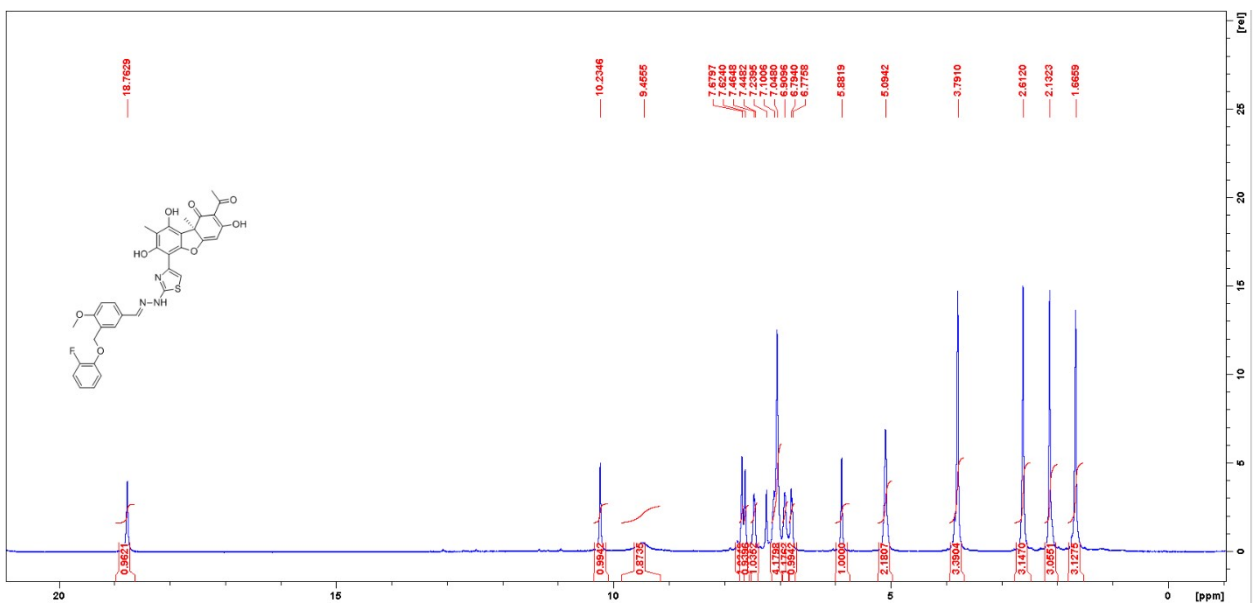

Figure S17: NMR <sup>1</sup>H spectrum of 10c

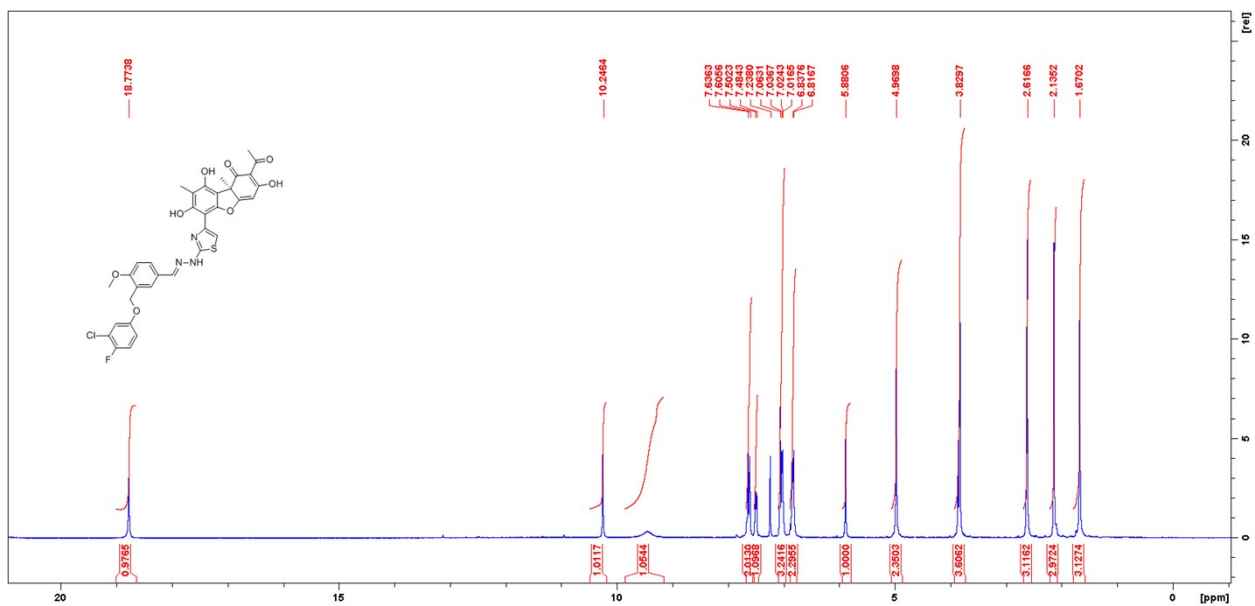

Figure S18: NMR <sup>1</sup>H spectrum of 10d

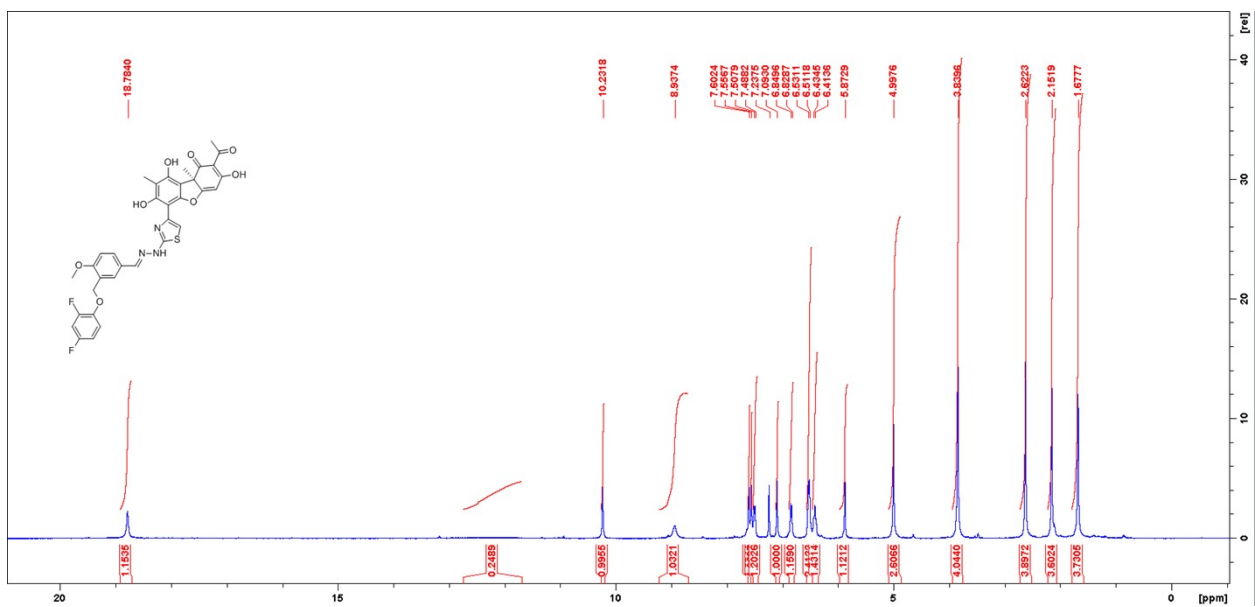

Figure S19: NMR <sup>1</sup>H spectrum of 10e

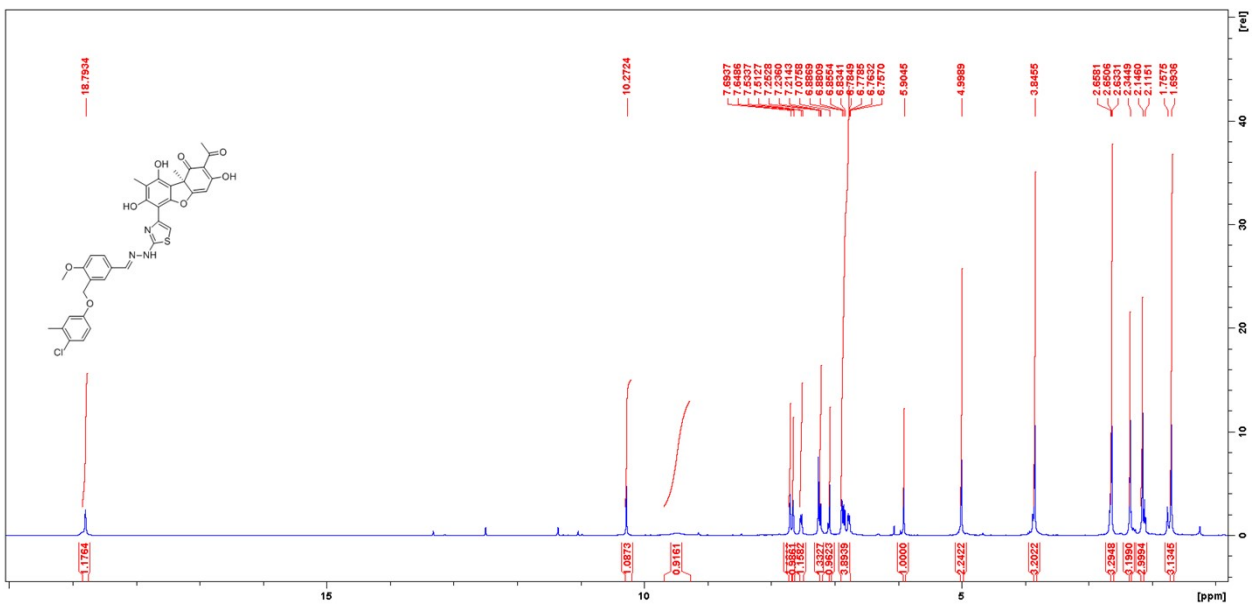



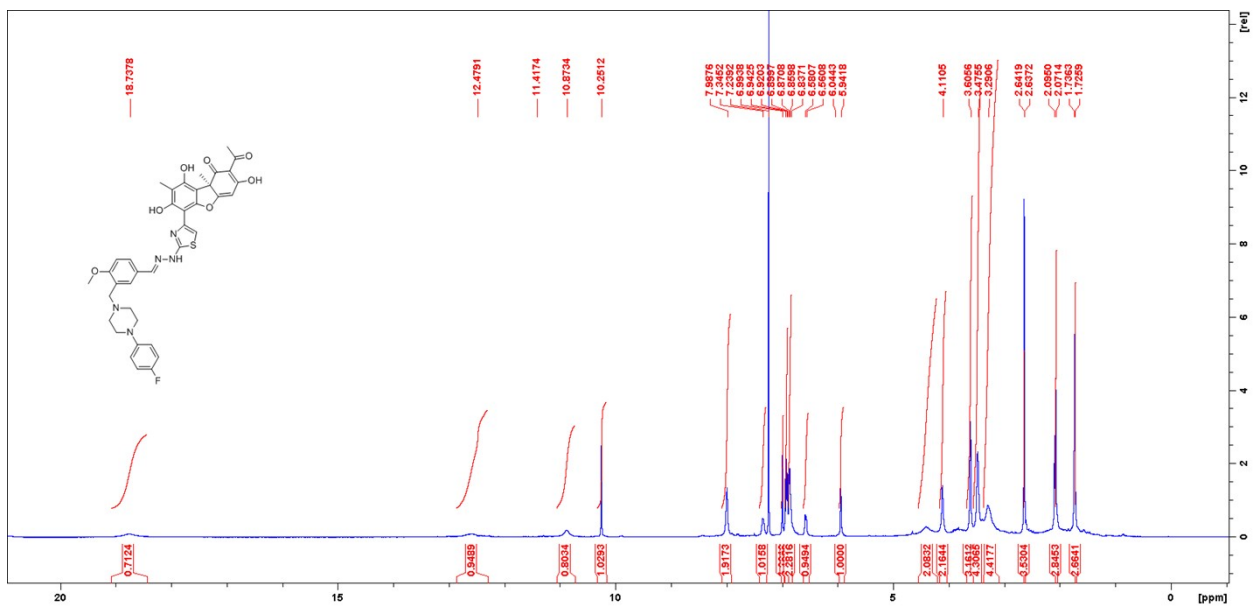

Figure S22: NMR <sup>1</sup>H spectrum of 10i

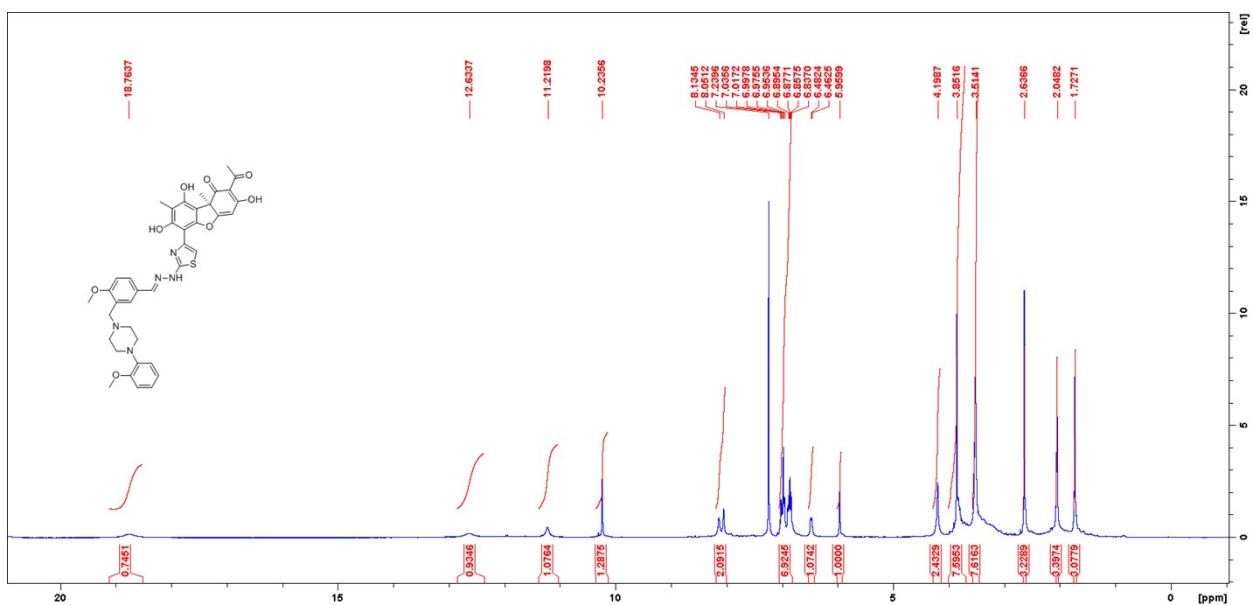

Figure S23: NMR <sup>1</sup>H spectrum of 10j

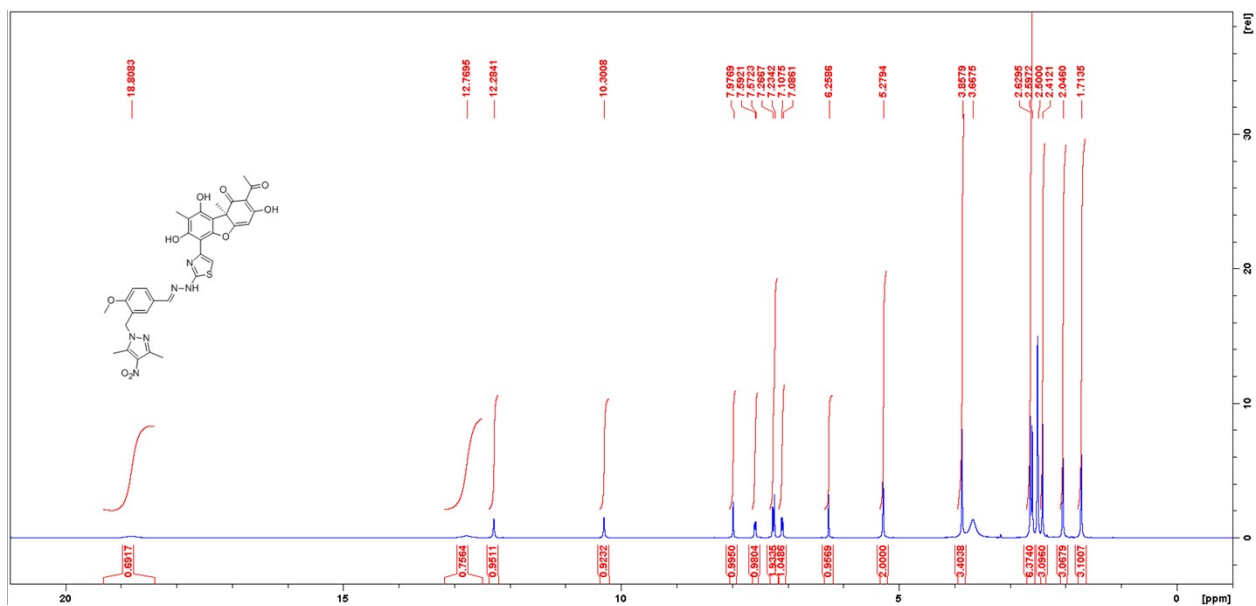

Figure S24: NMR  $^1\text{H}$  spectrum of 10k
